# Supplementary material
Source: PubMed Central journal article supplement (PMC4538707)

**Figure S1, Related to Figure 1**

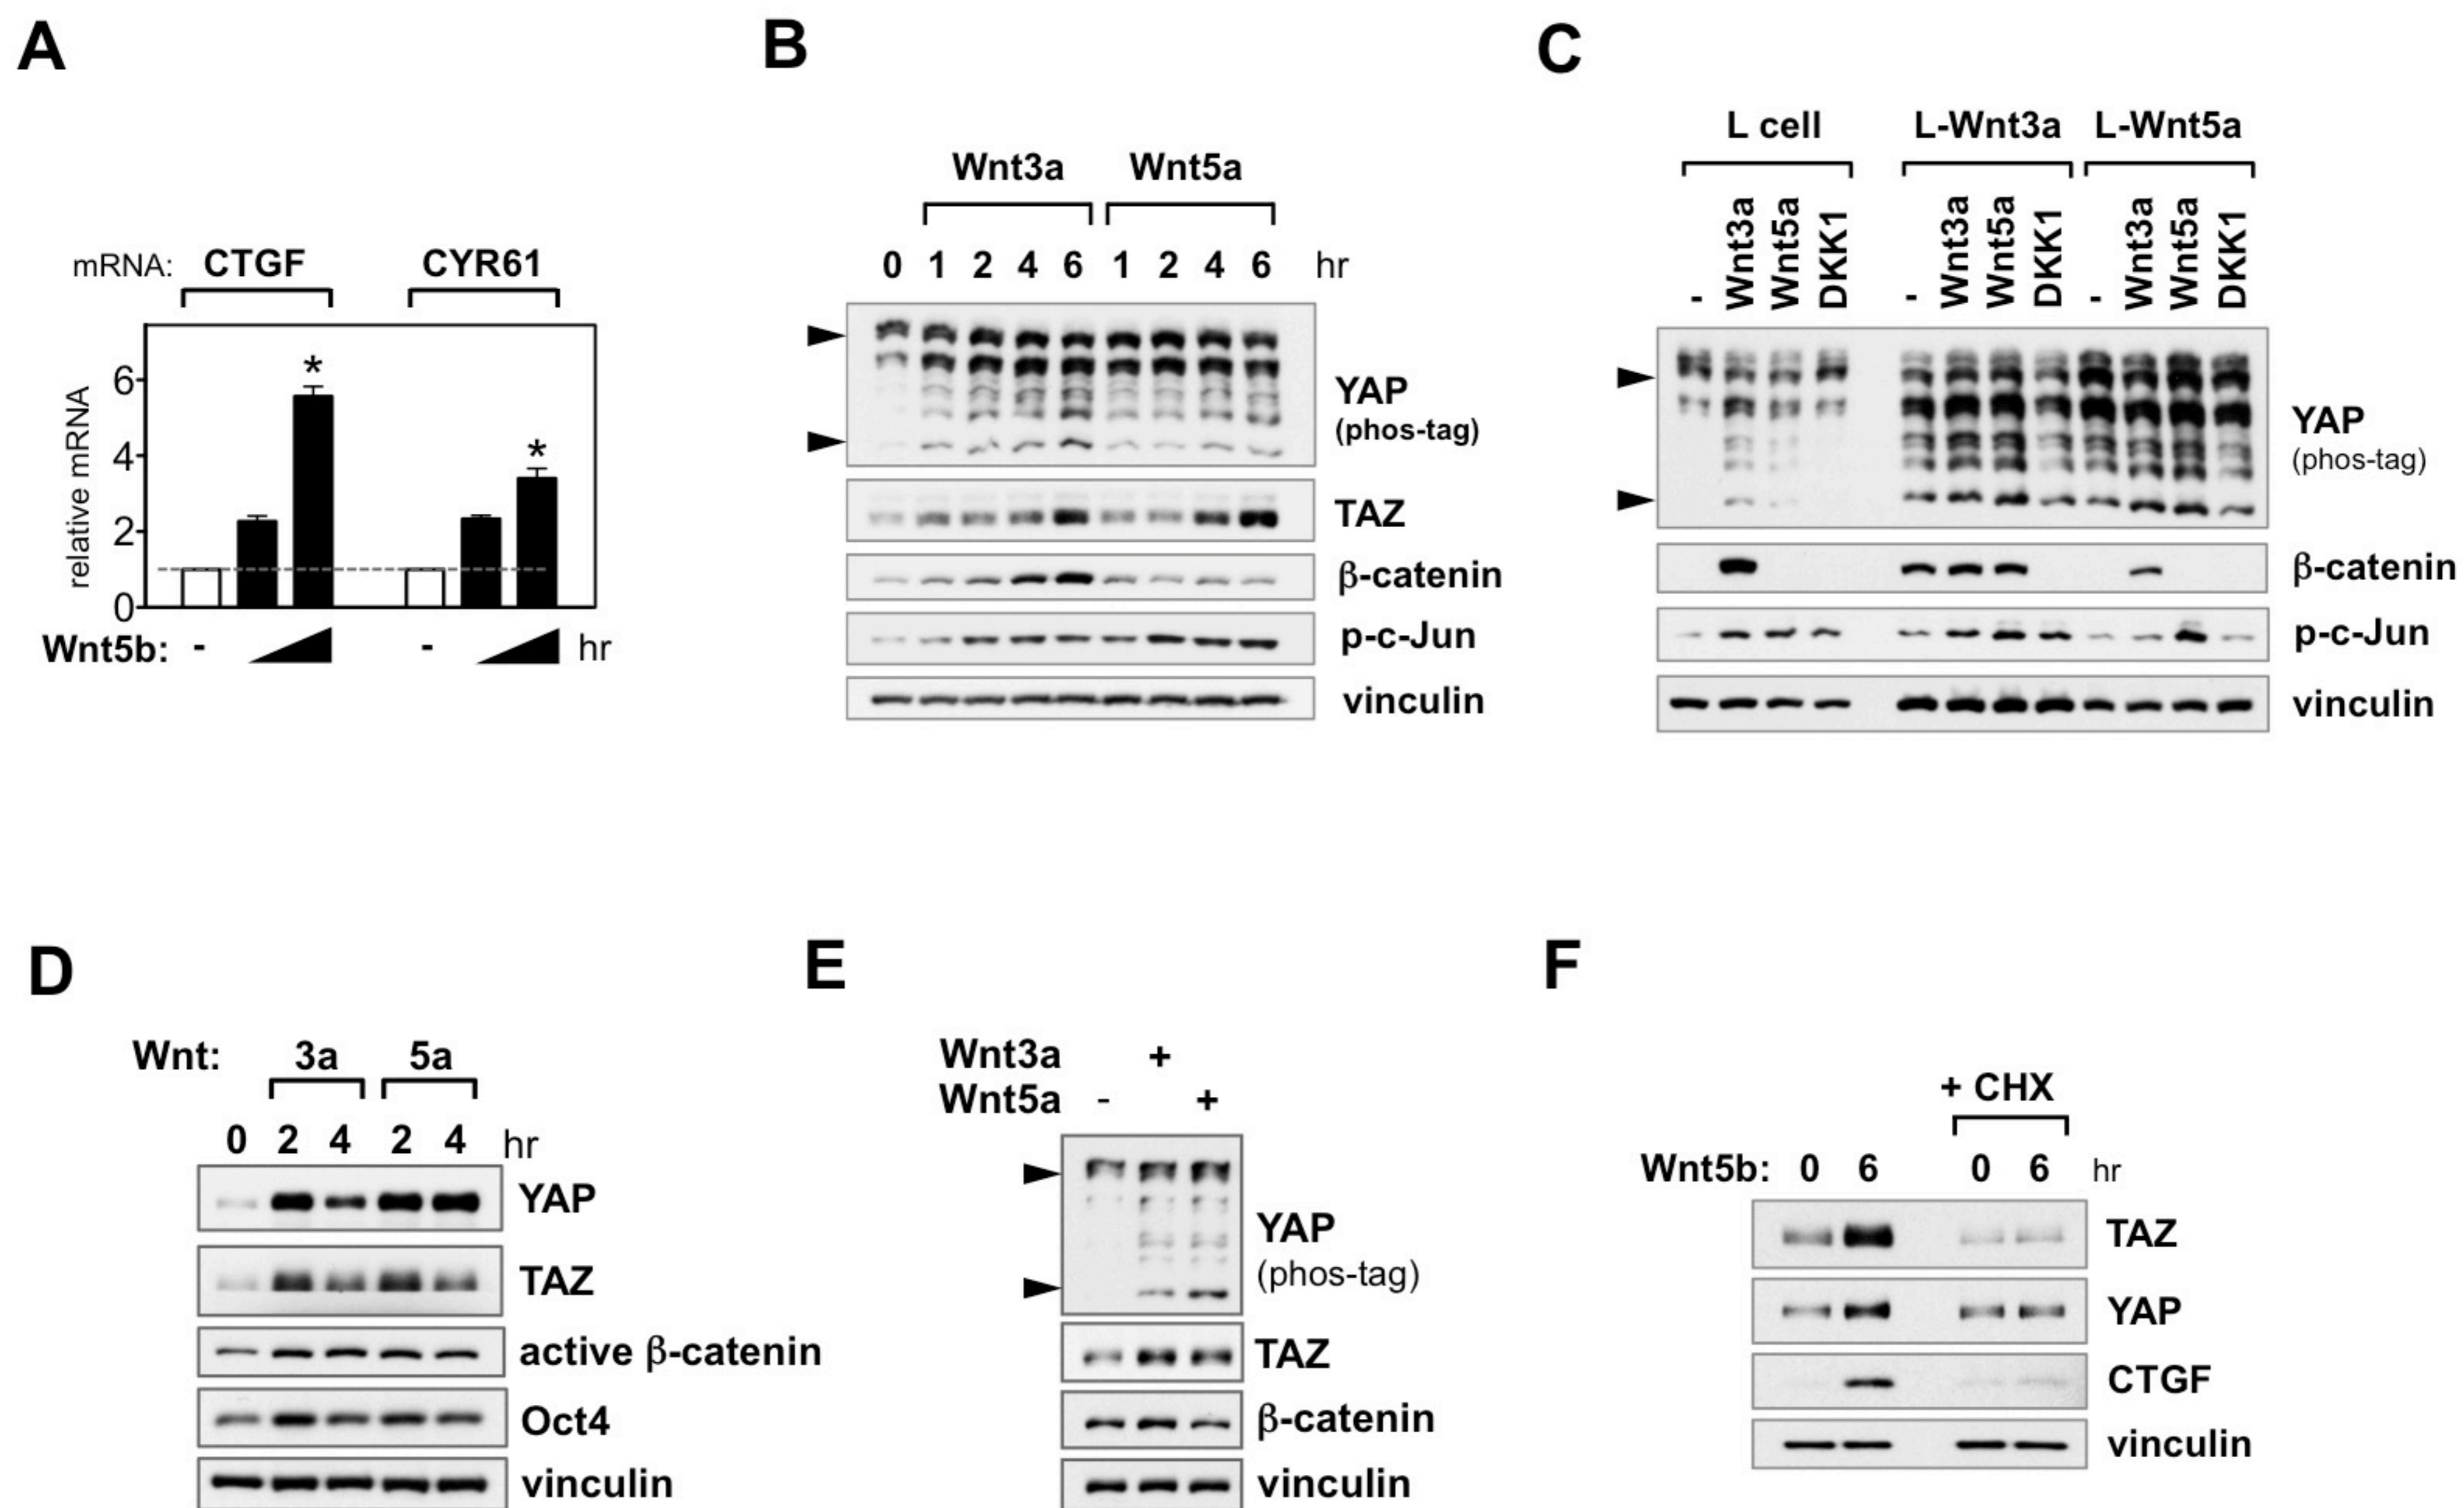

Supplement: NIHMS708990-supplement-1.pdf [file NIHMS708990-supplement-1.pdf]

**Figure S2, Related to Figure 2**

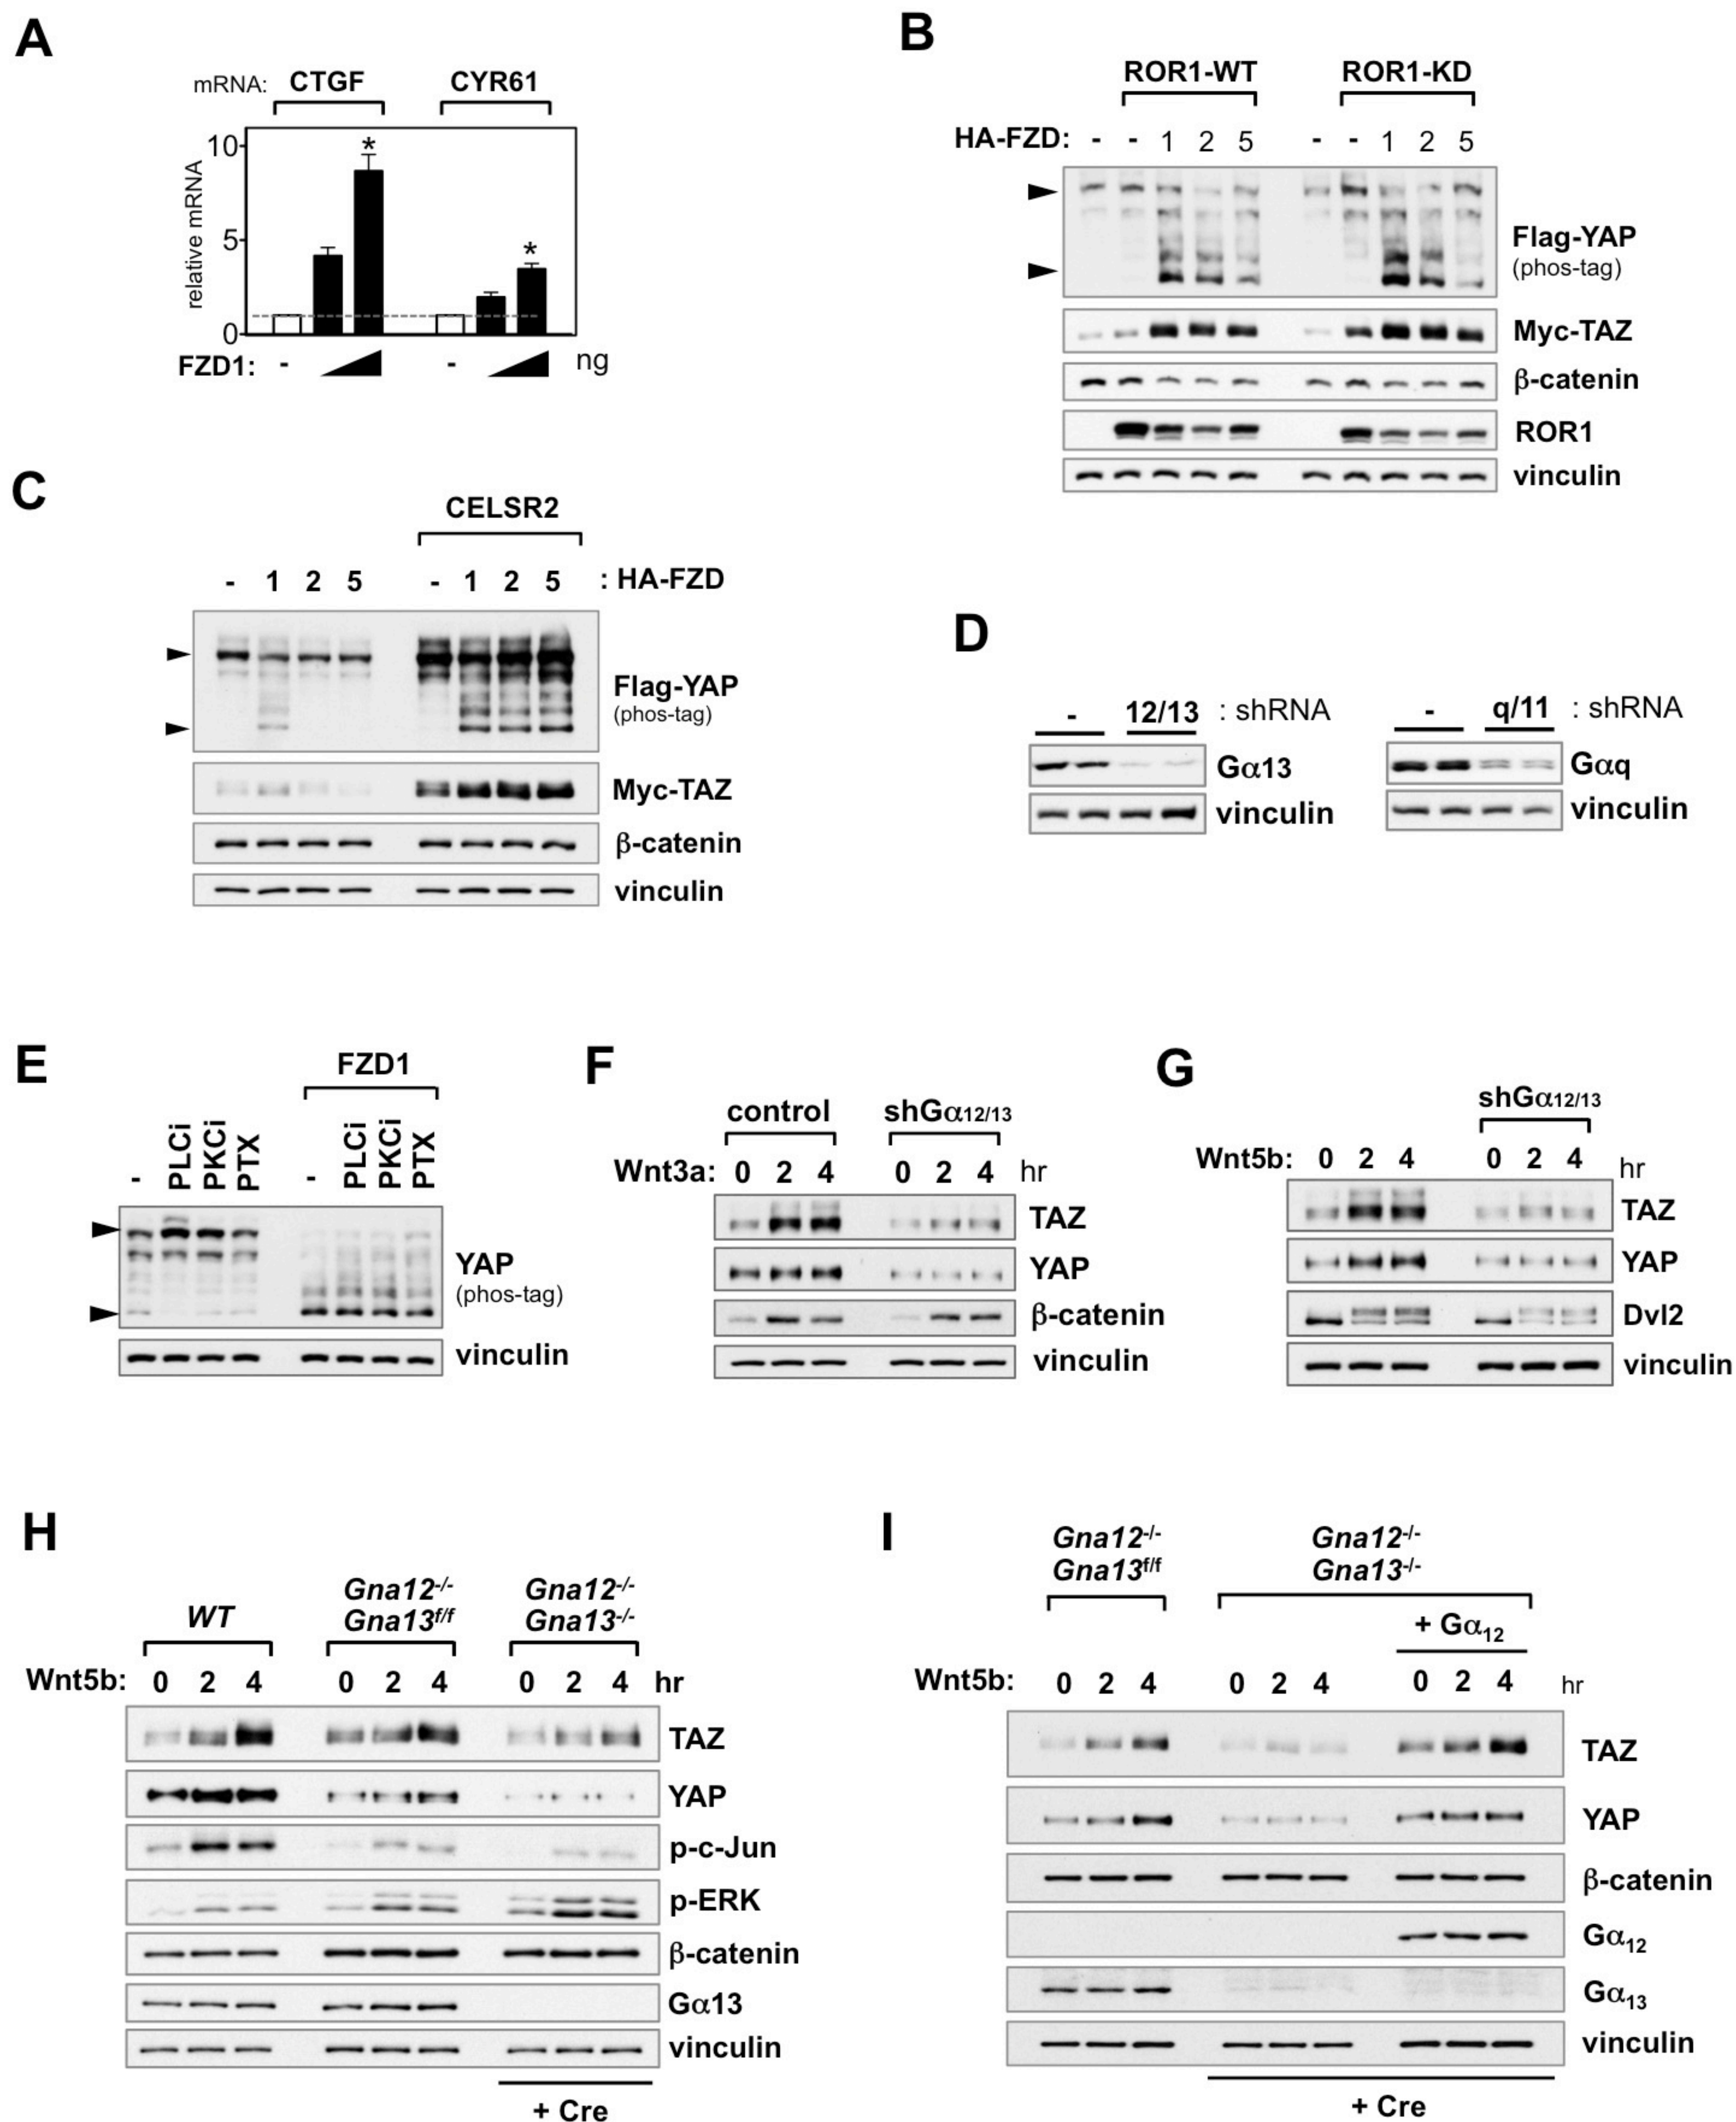

Supplement: NIHMS708990-supplement-2.pdf [file NIHMS708990-supplement-2.pdf]

**Figure S3, Related to Figure 3**

**A**

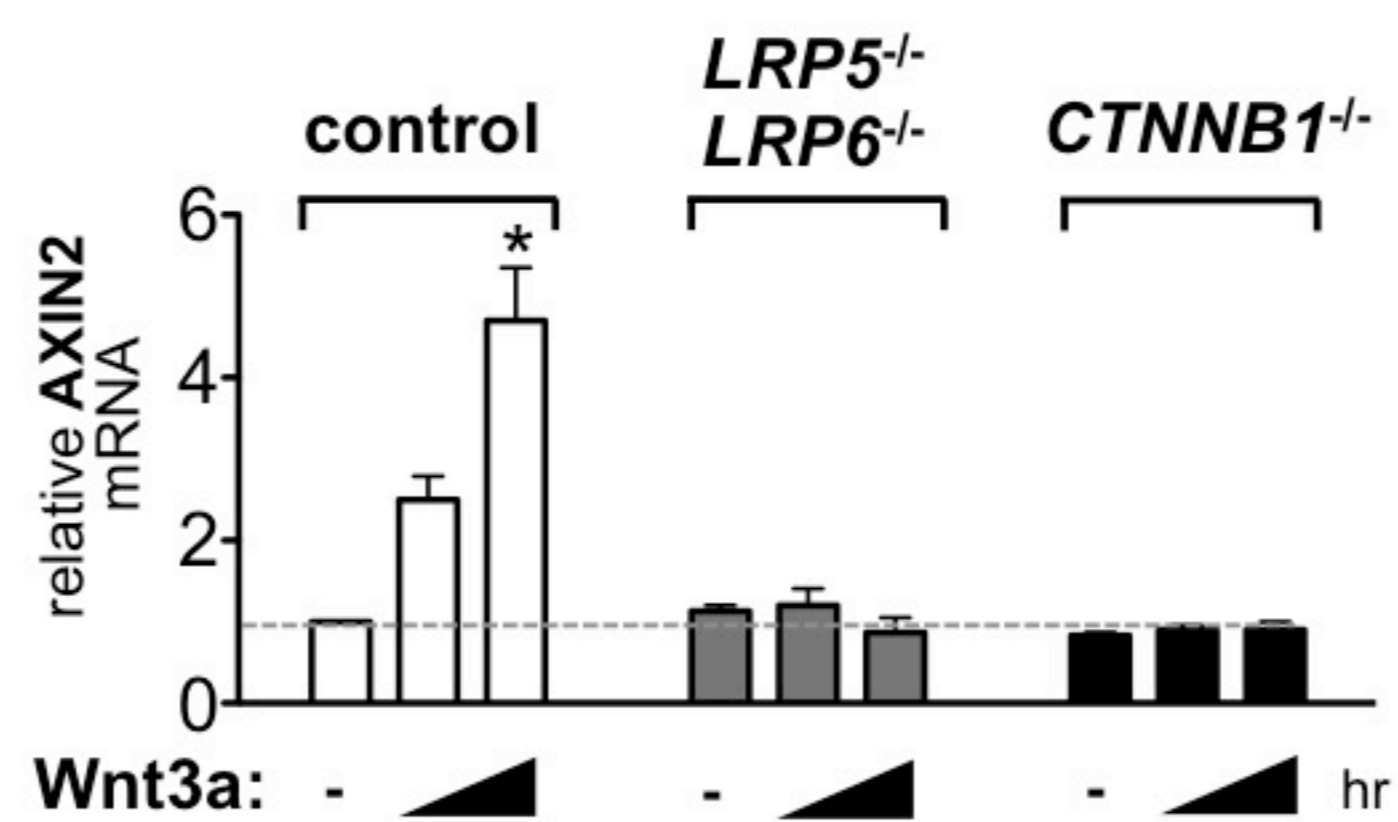

**B**

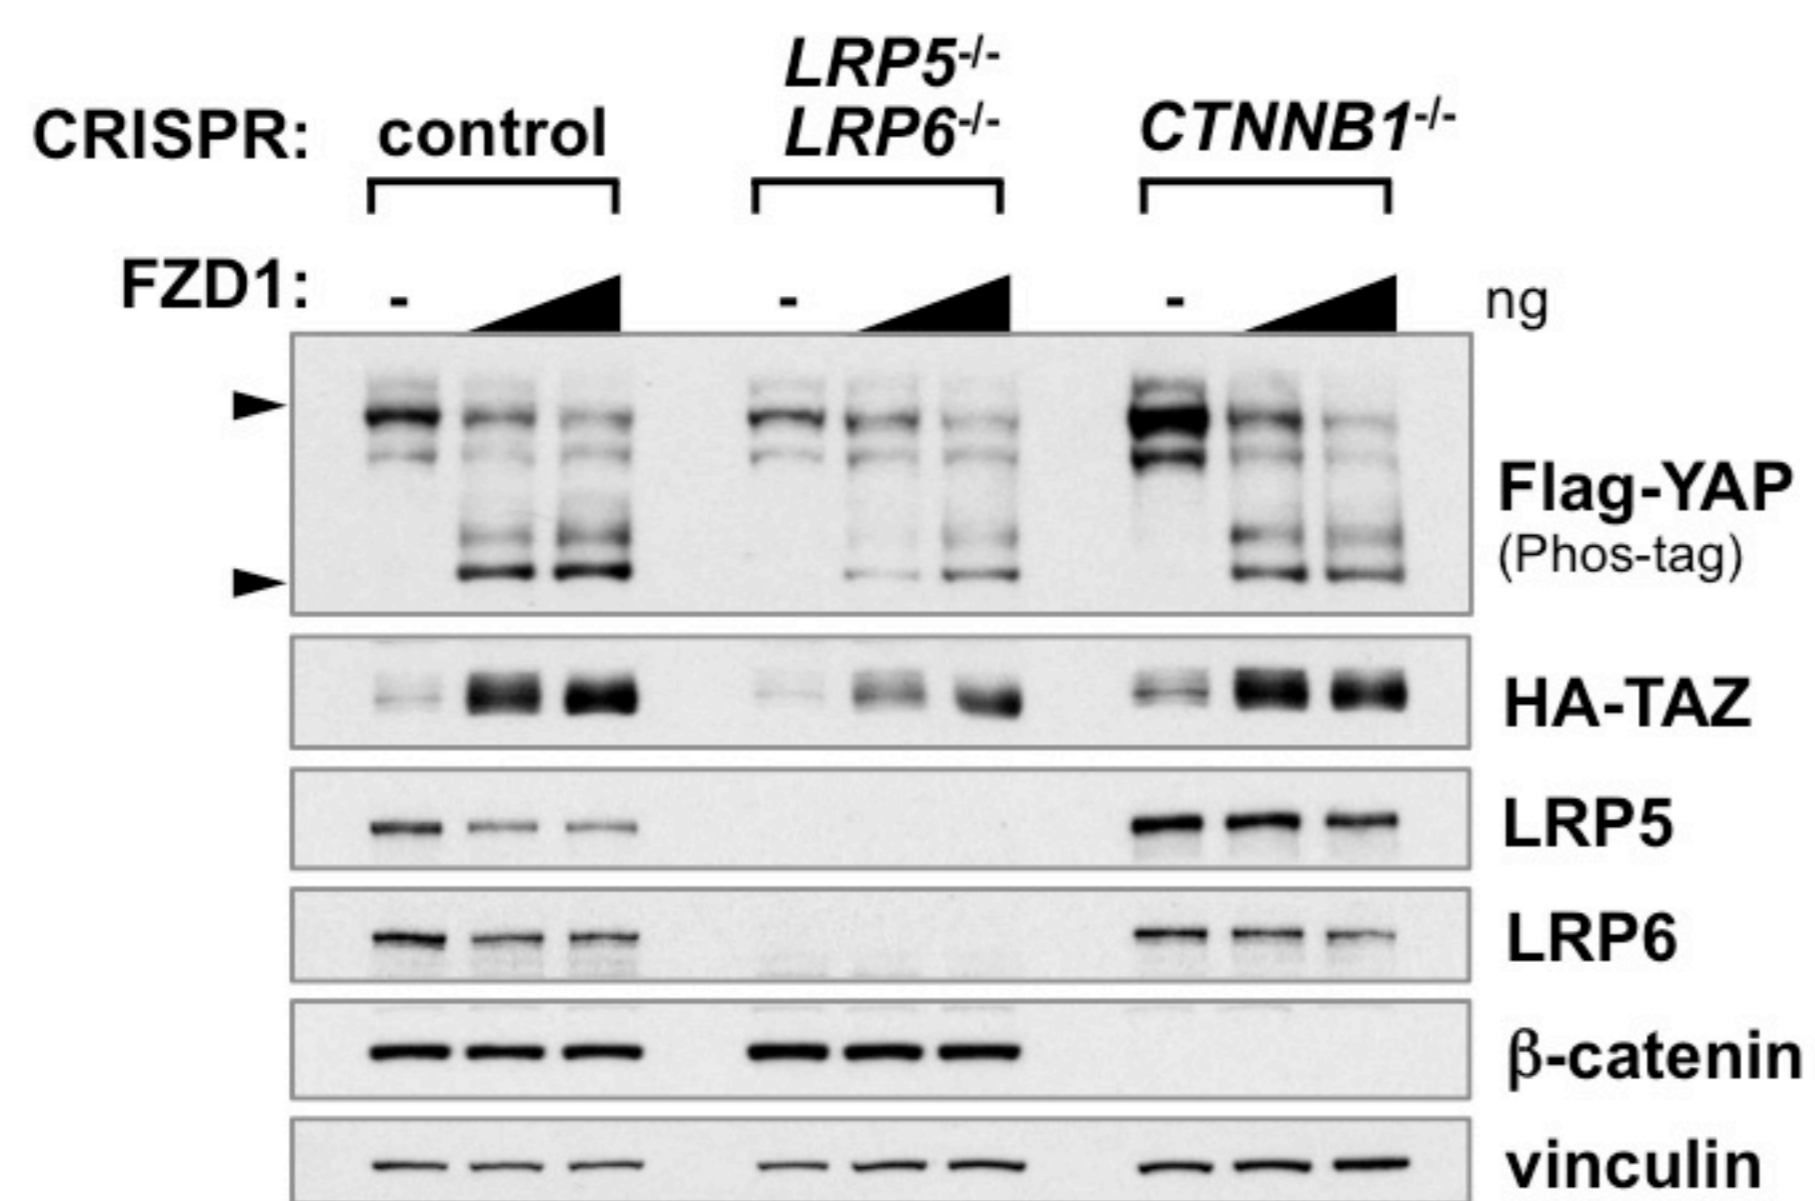

**C**

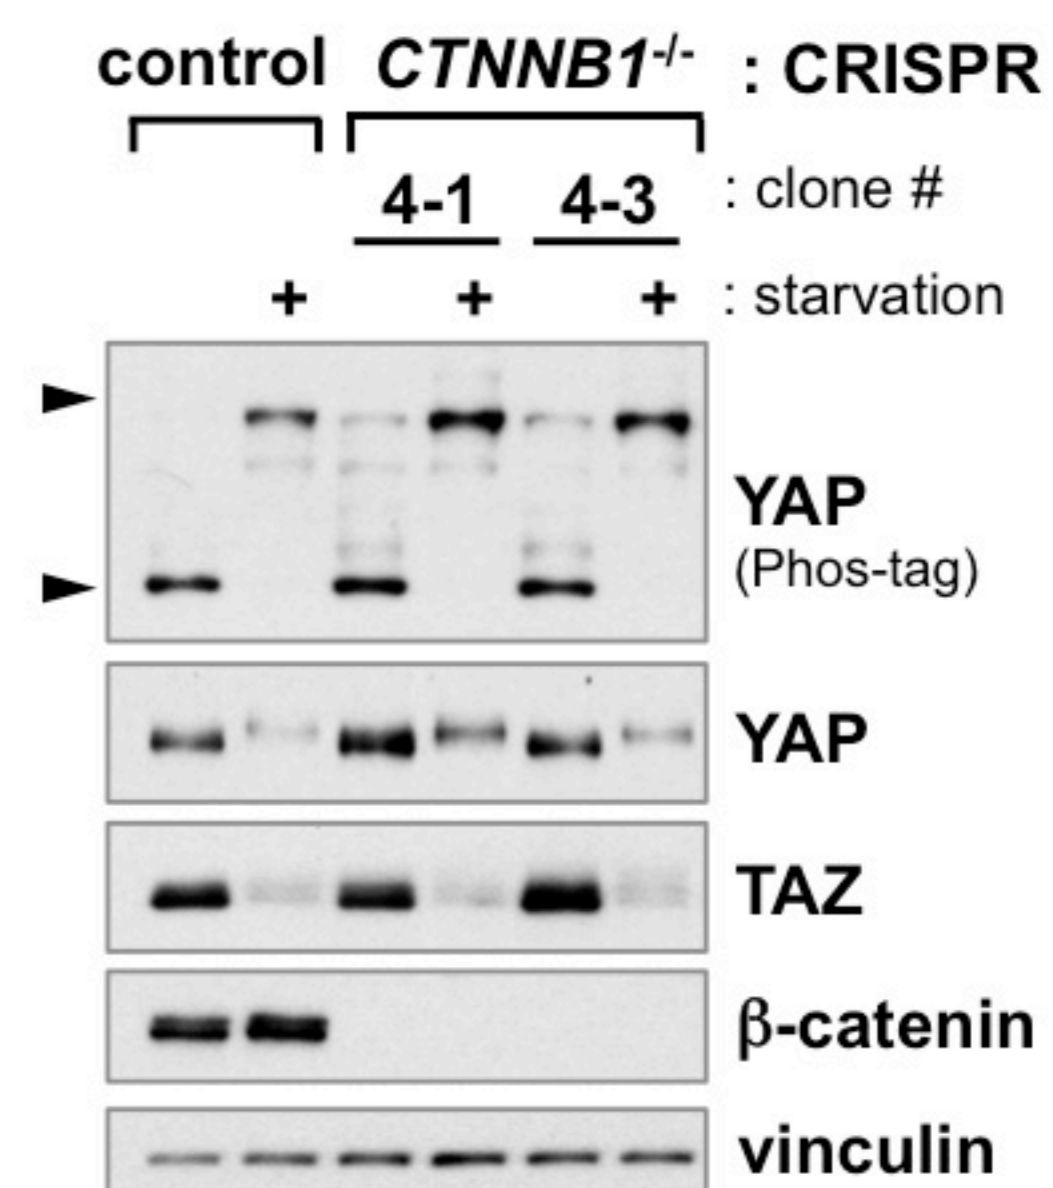

Supplement: NIHMS708990-supplement-3.pdf [file NIHMS708990-supplement-3.pdf]

**Figure S4, Related to Figure 4**

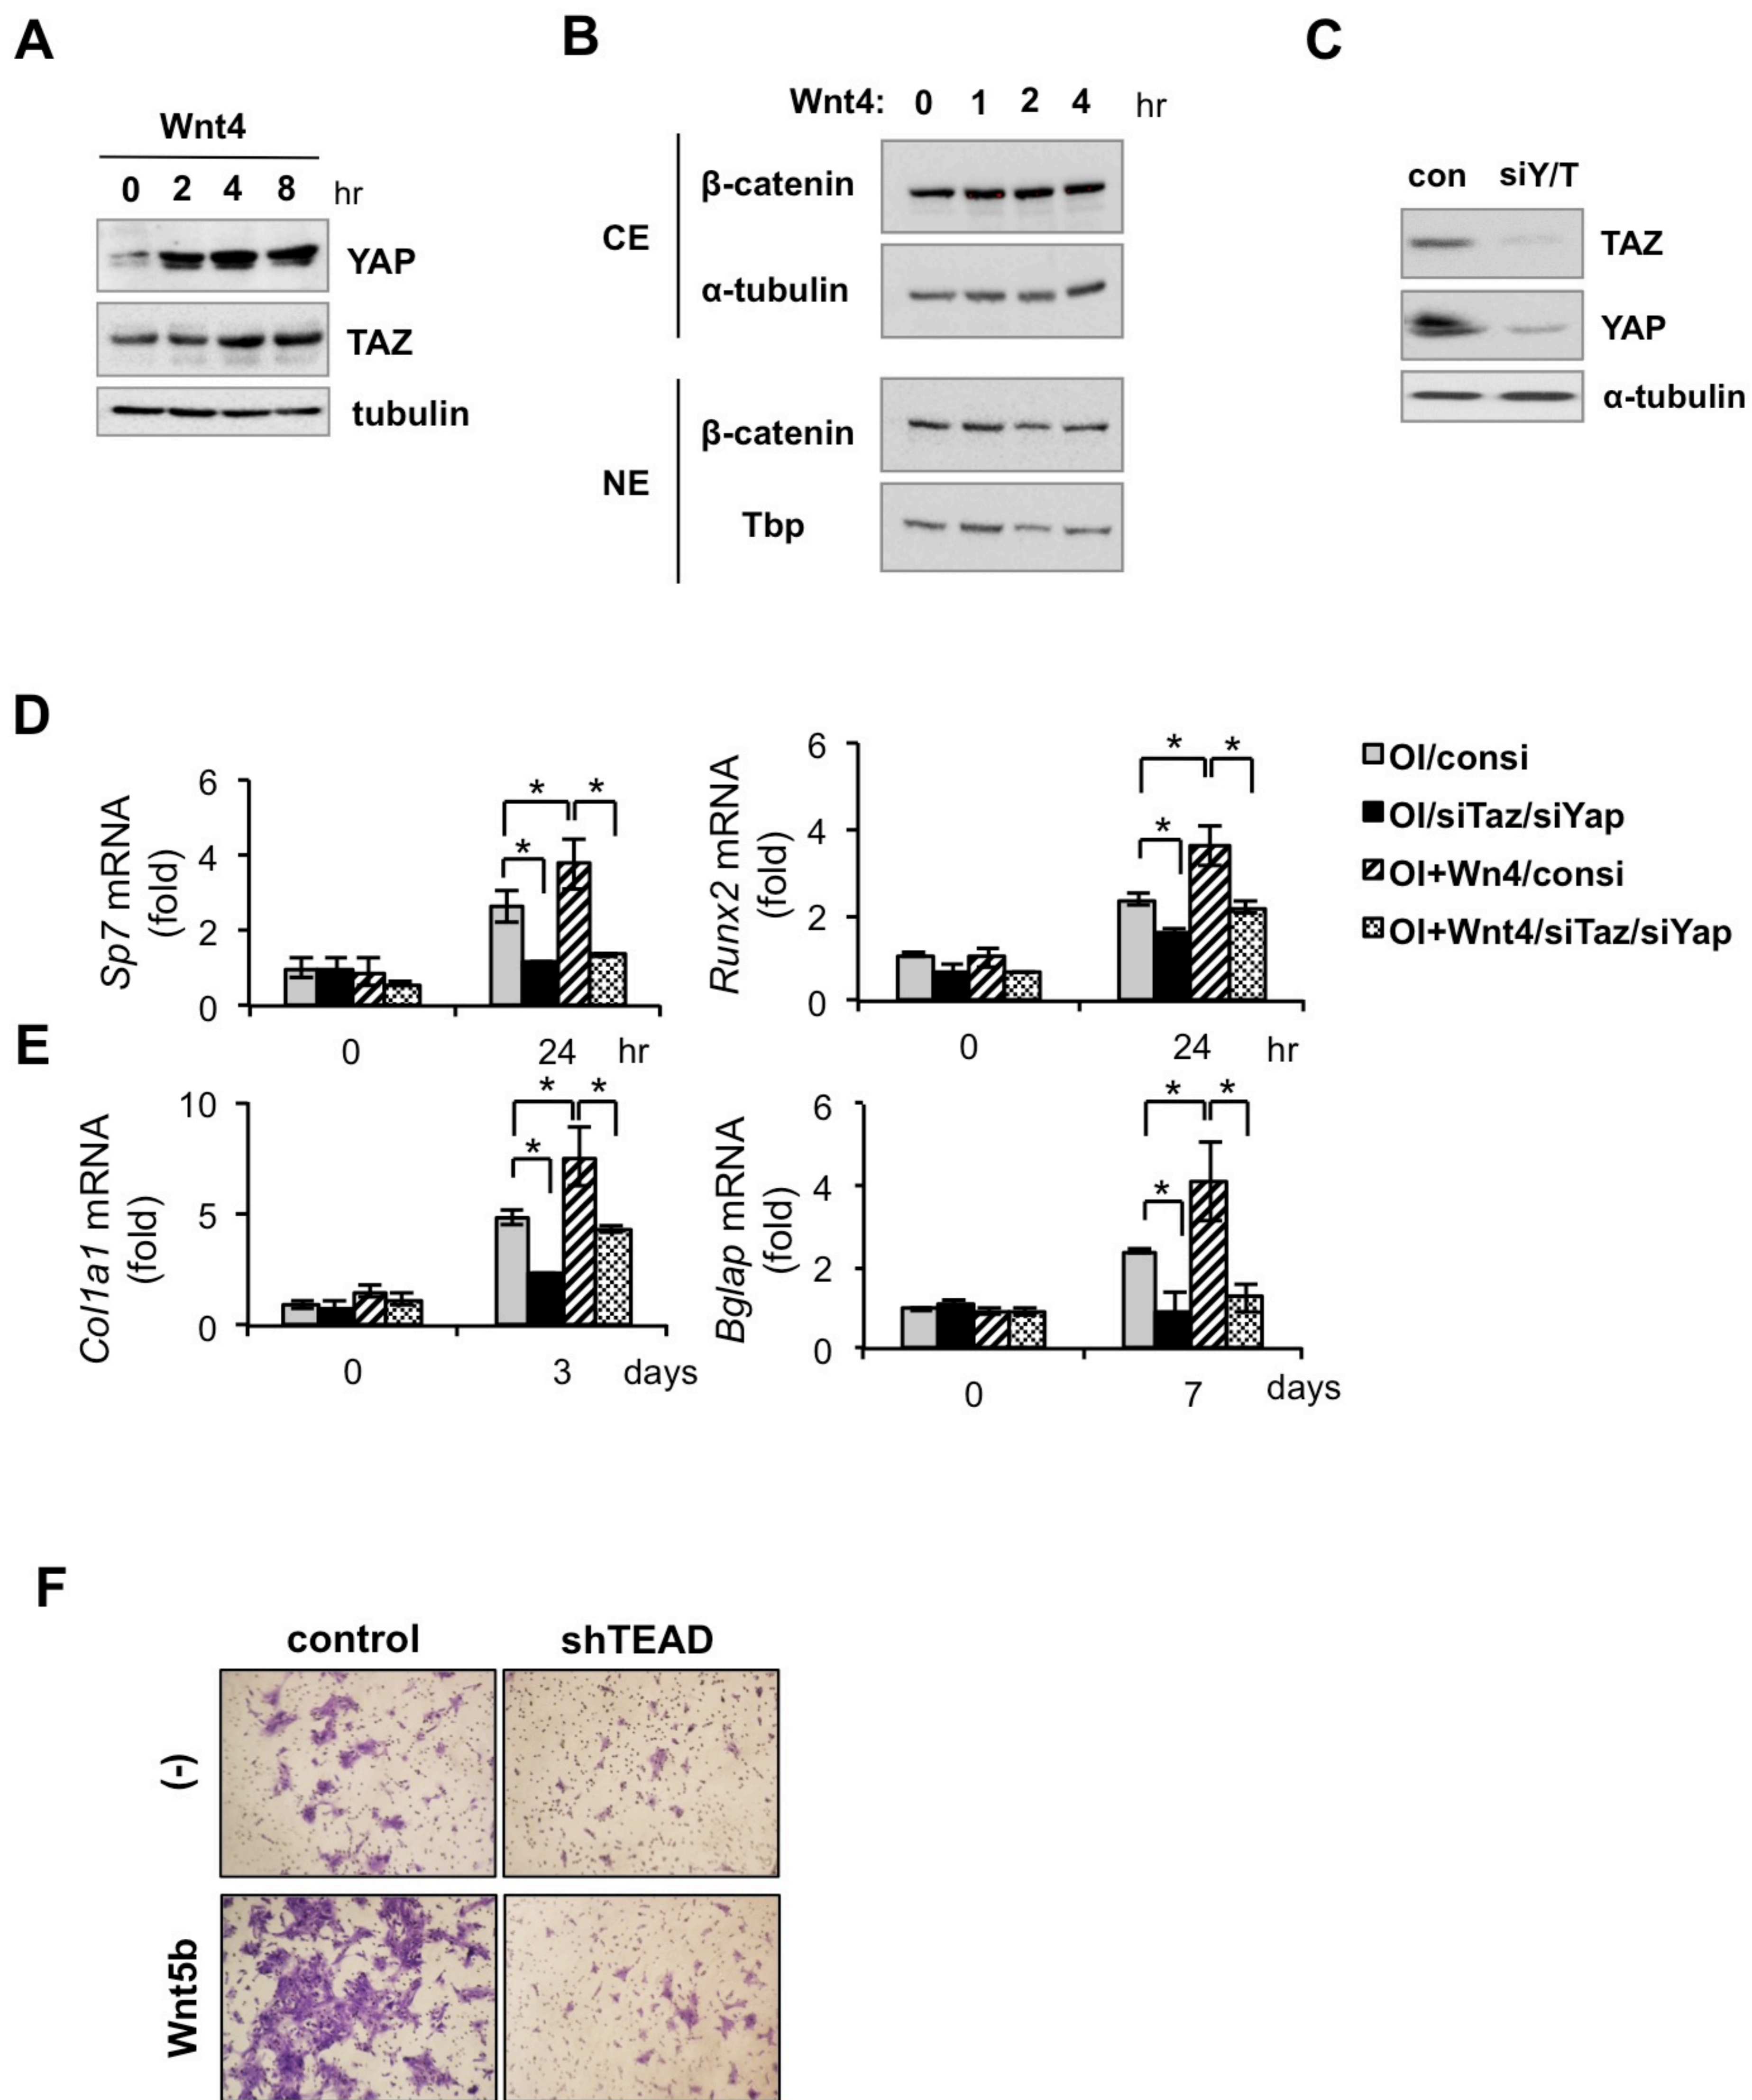

Supplement: NIHMS708990-supplement-4.pdf [file NIHMS708990-supplement-4.pdf]

Figure S5, Related to Figure 5

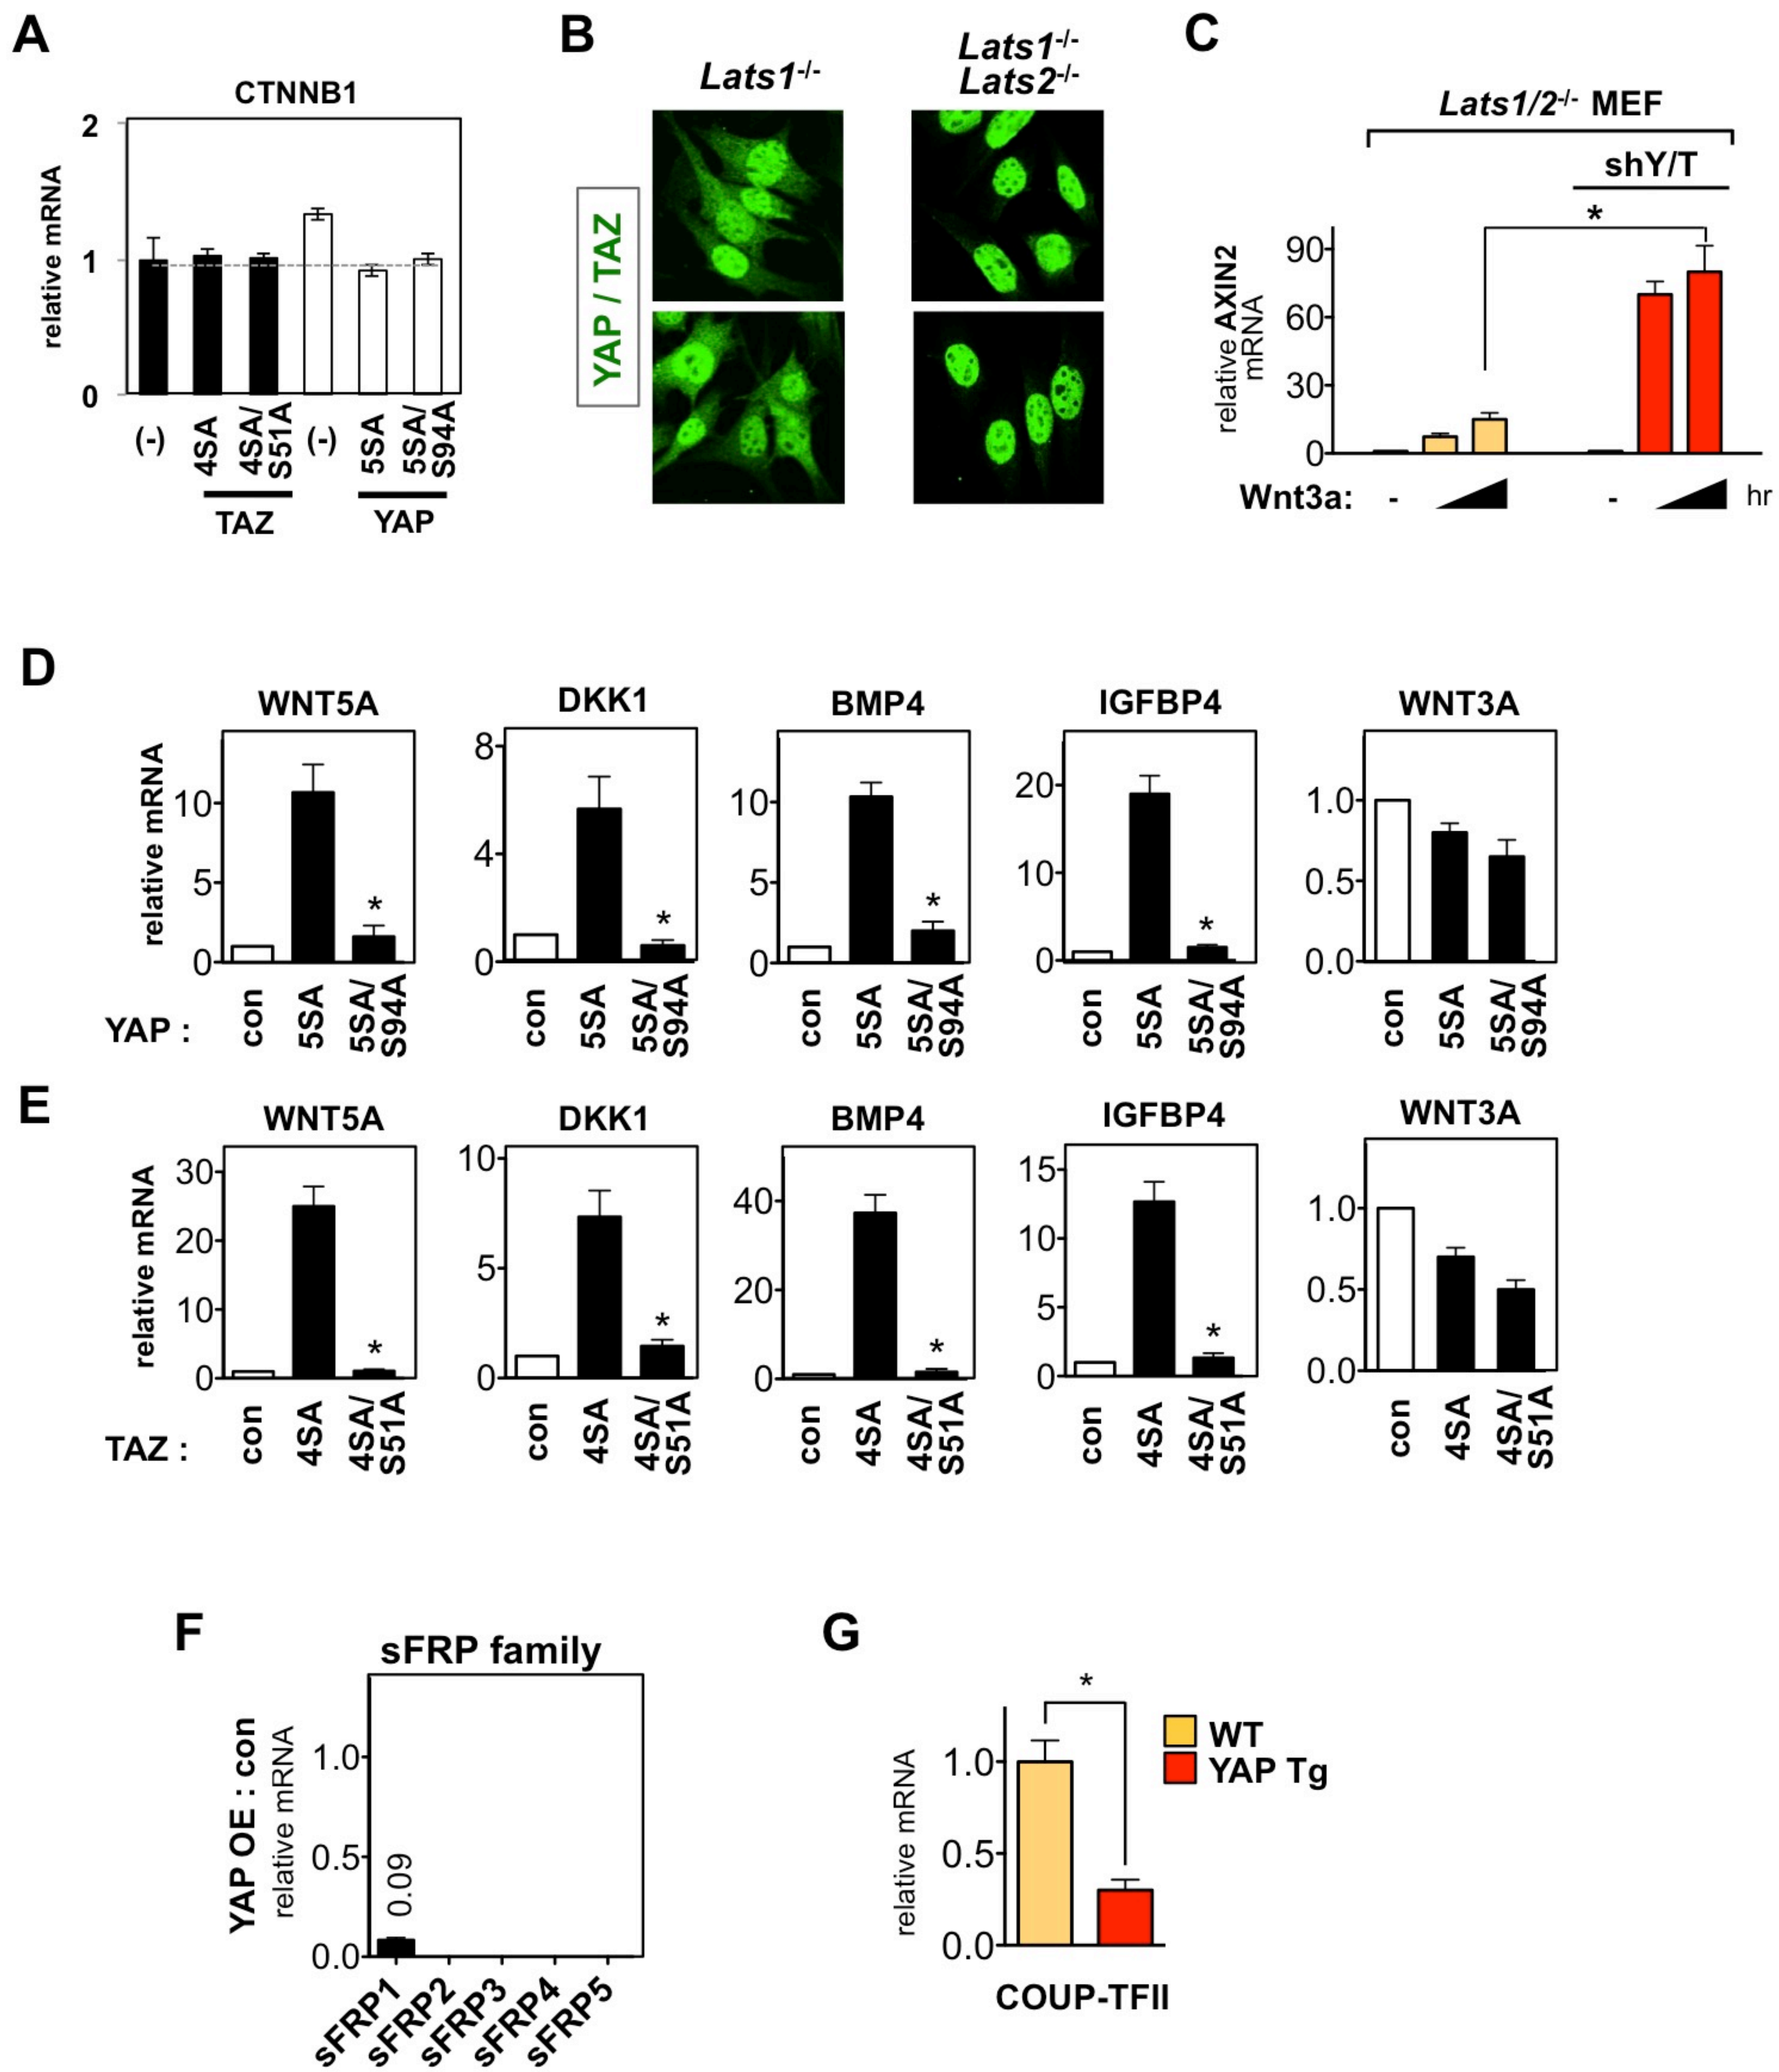

Supplement: NIHMS708990-supplement-5.pdf [file NIHMS708990-supplement-5.pdf]

Figure S6, Related to Figure 6

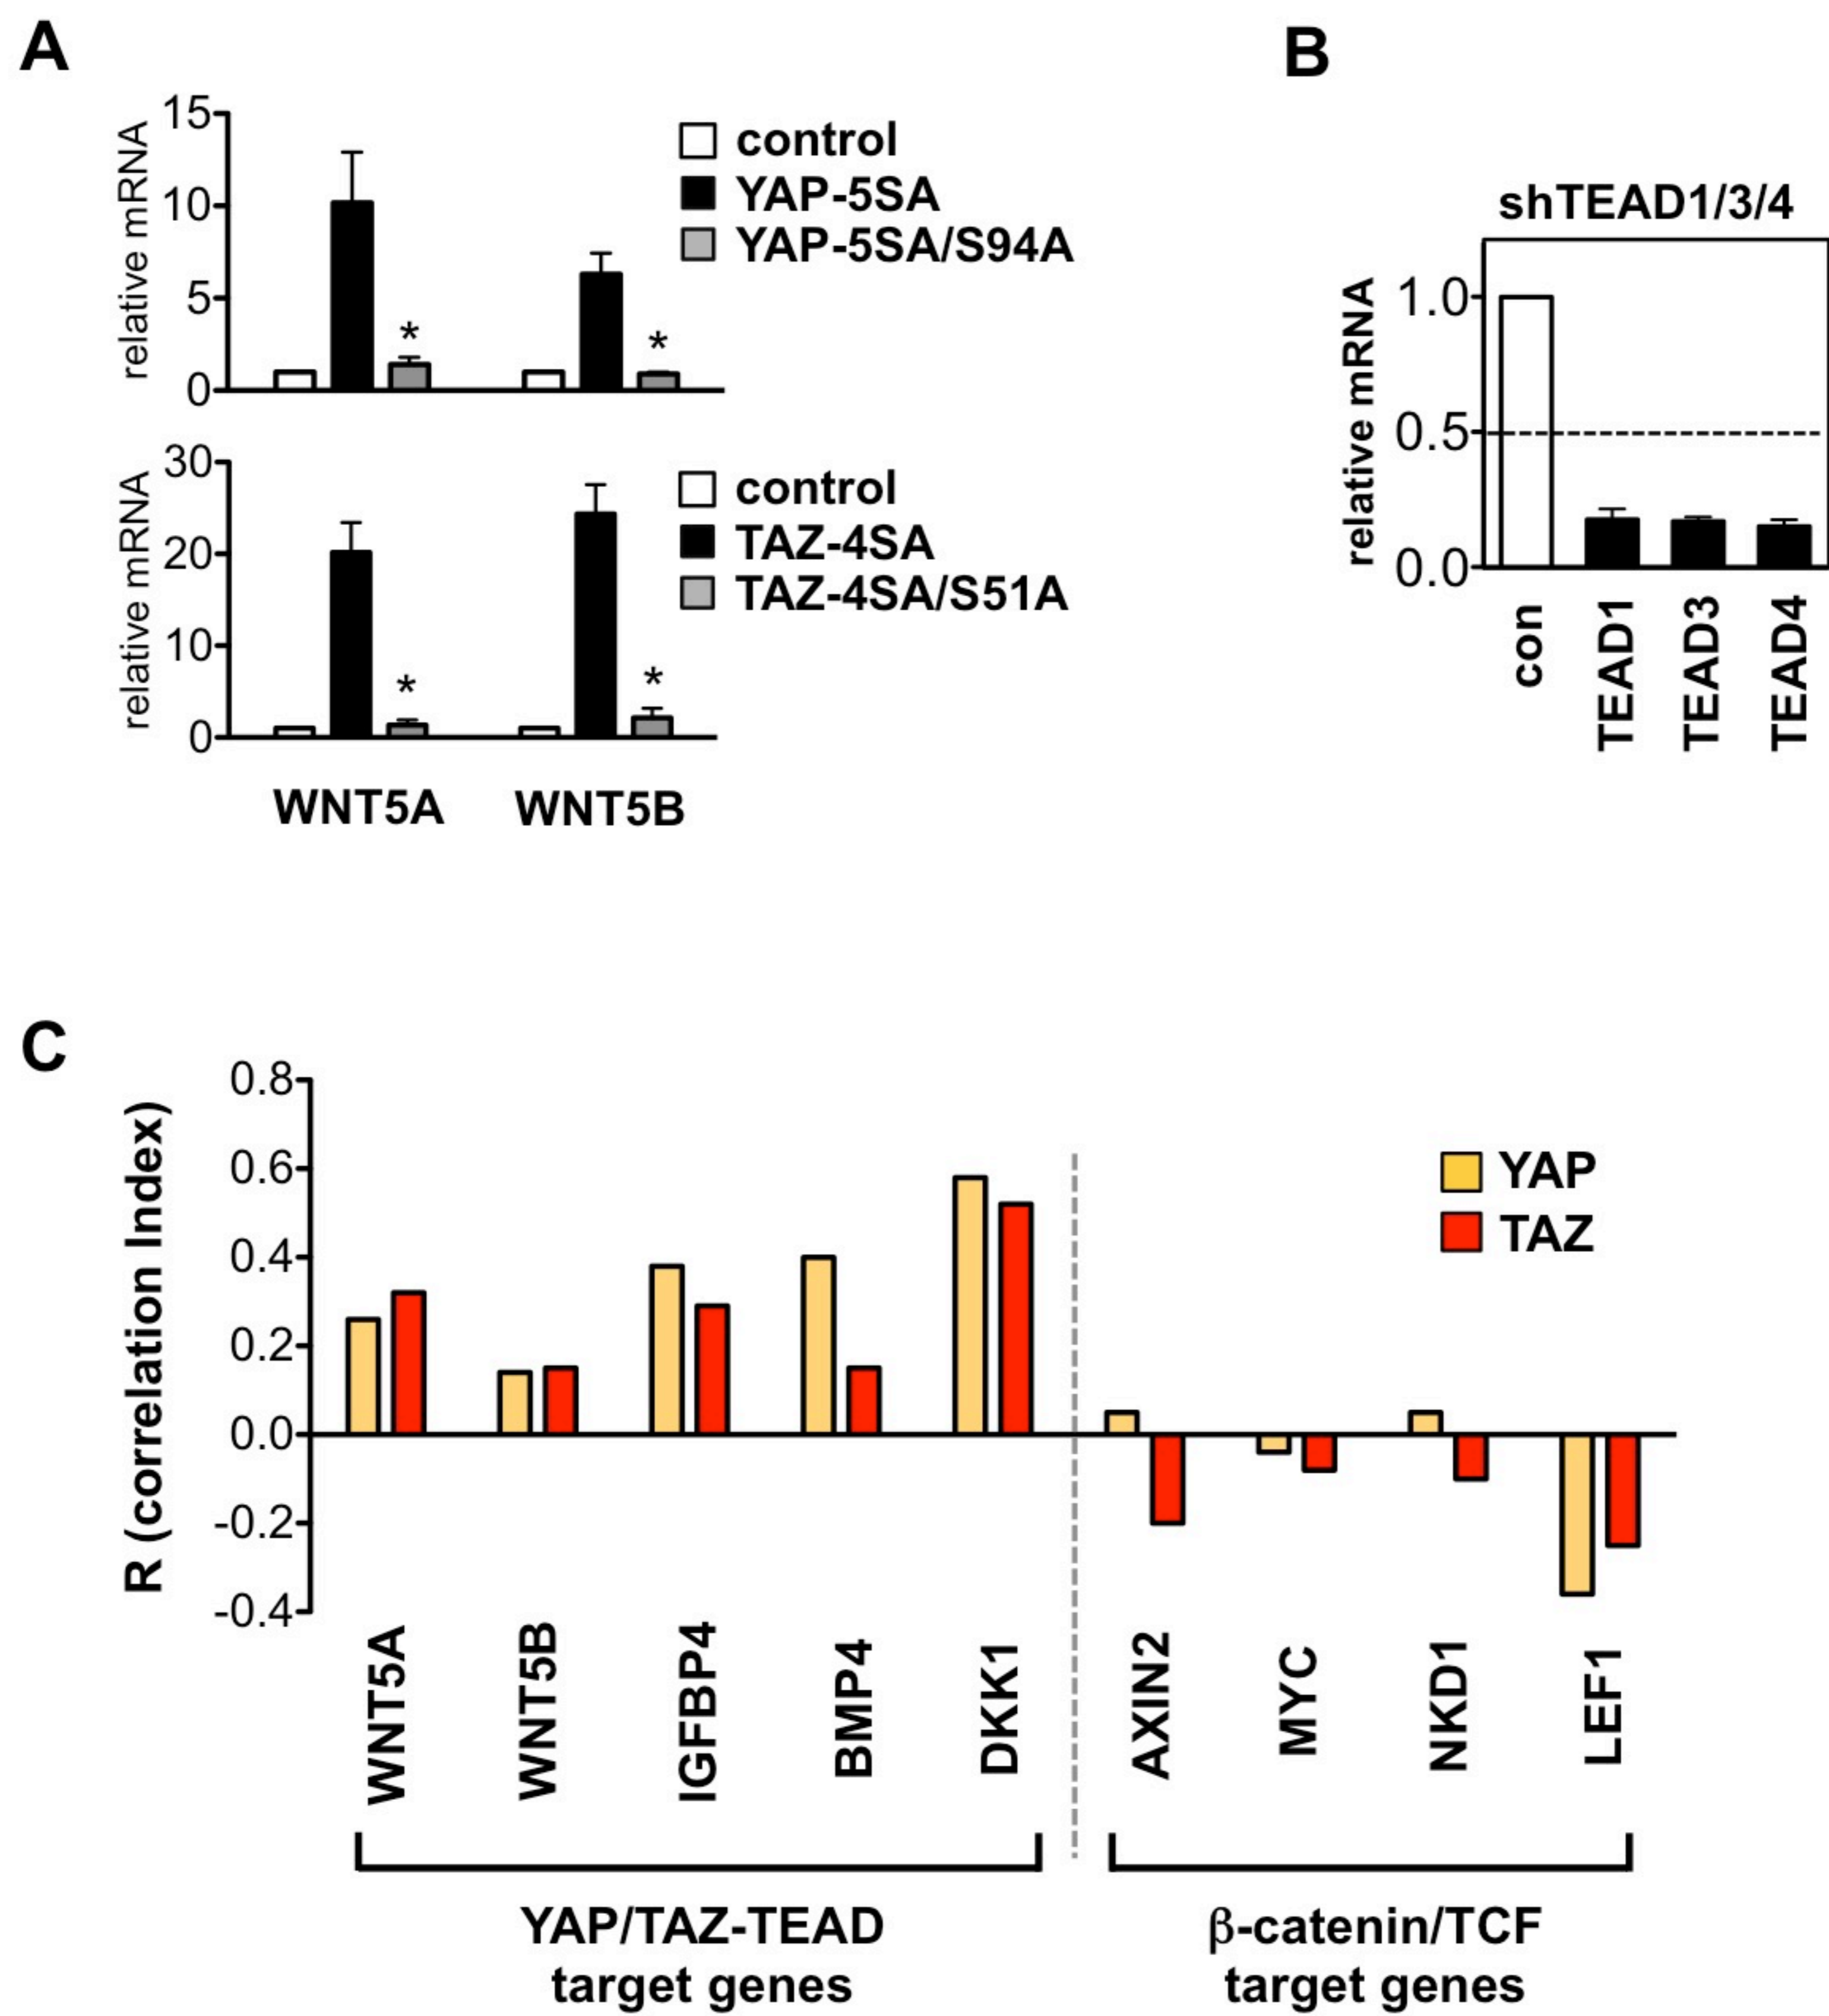

Supplement: NIHMS708990-supplement-6.pdf [file NIHMS708990-supplement-6.pdf]

Figure S7, Related to Figure 7

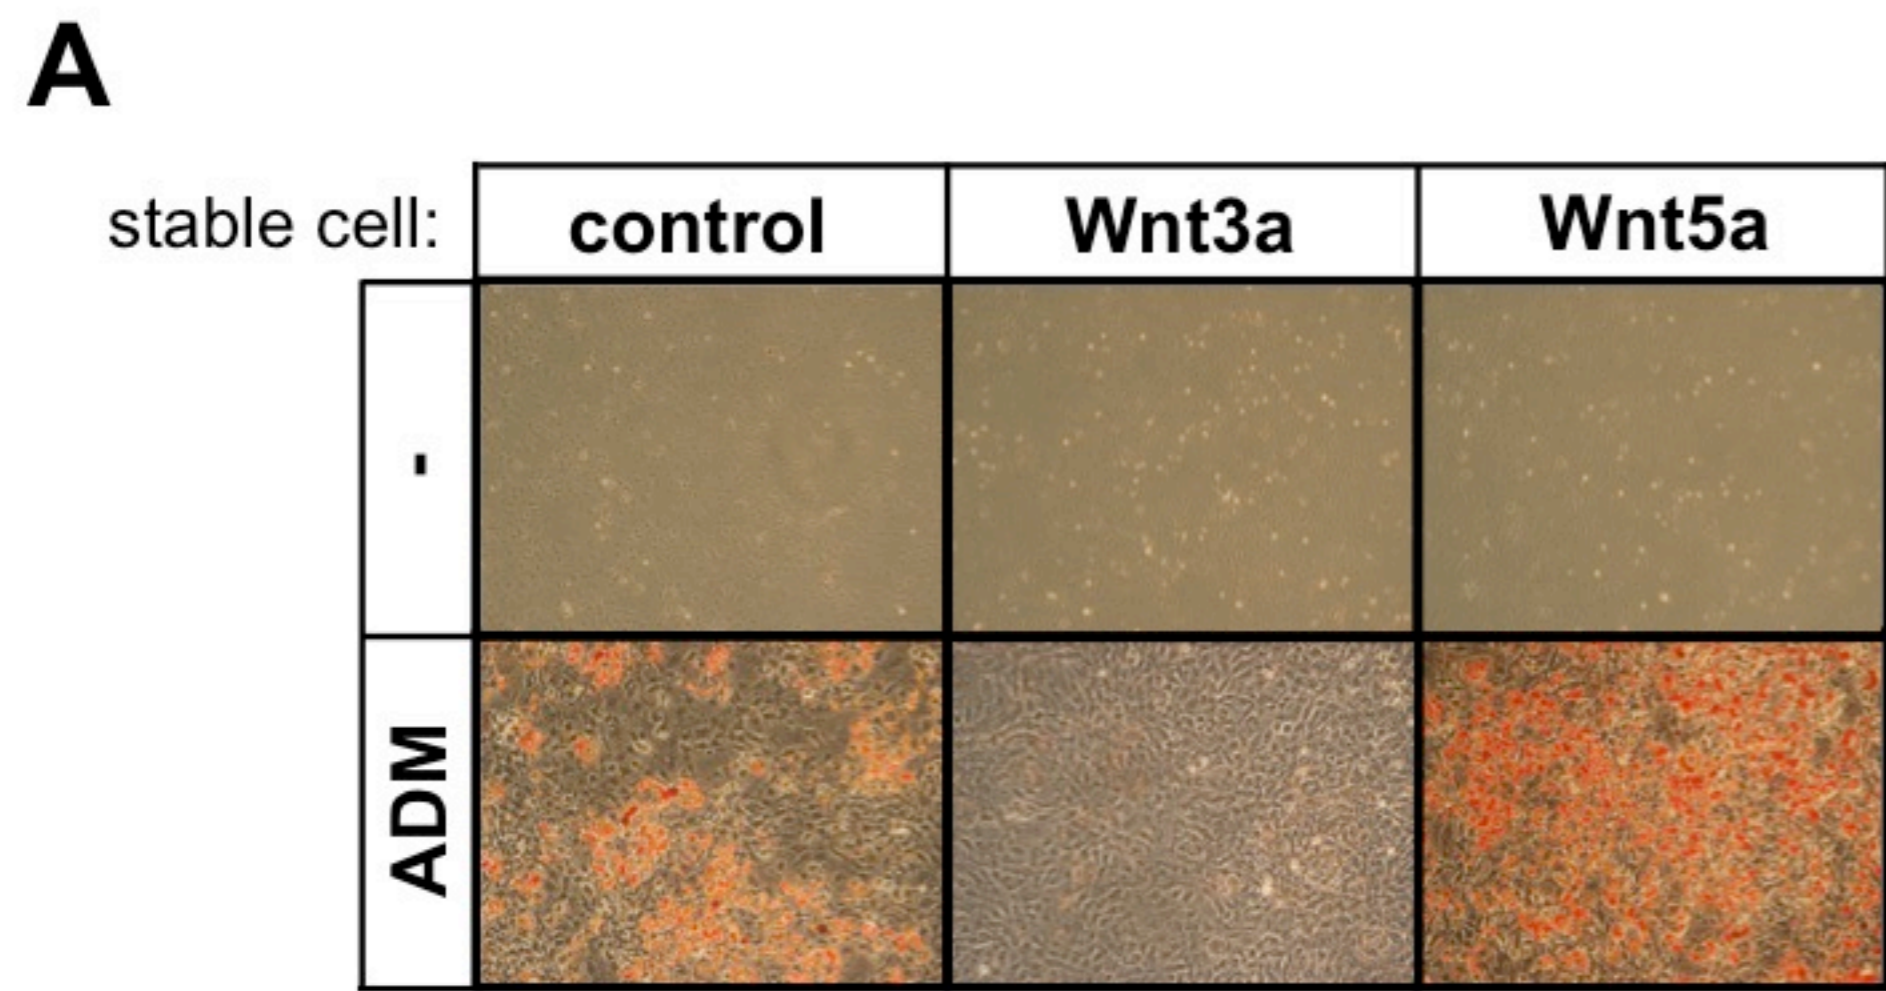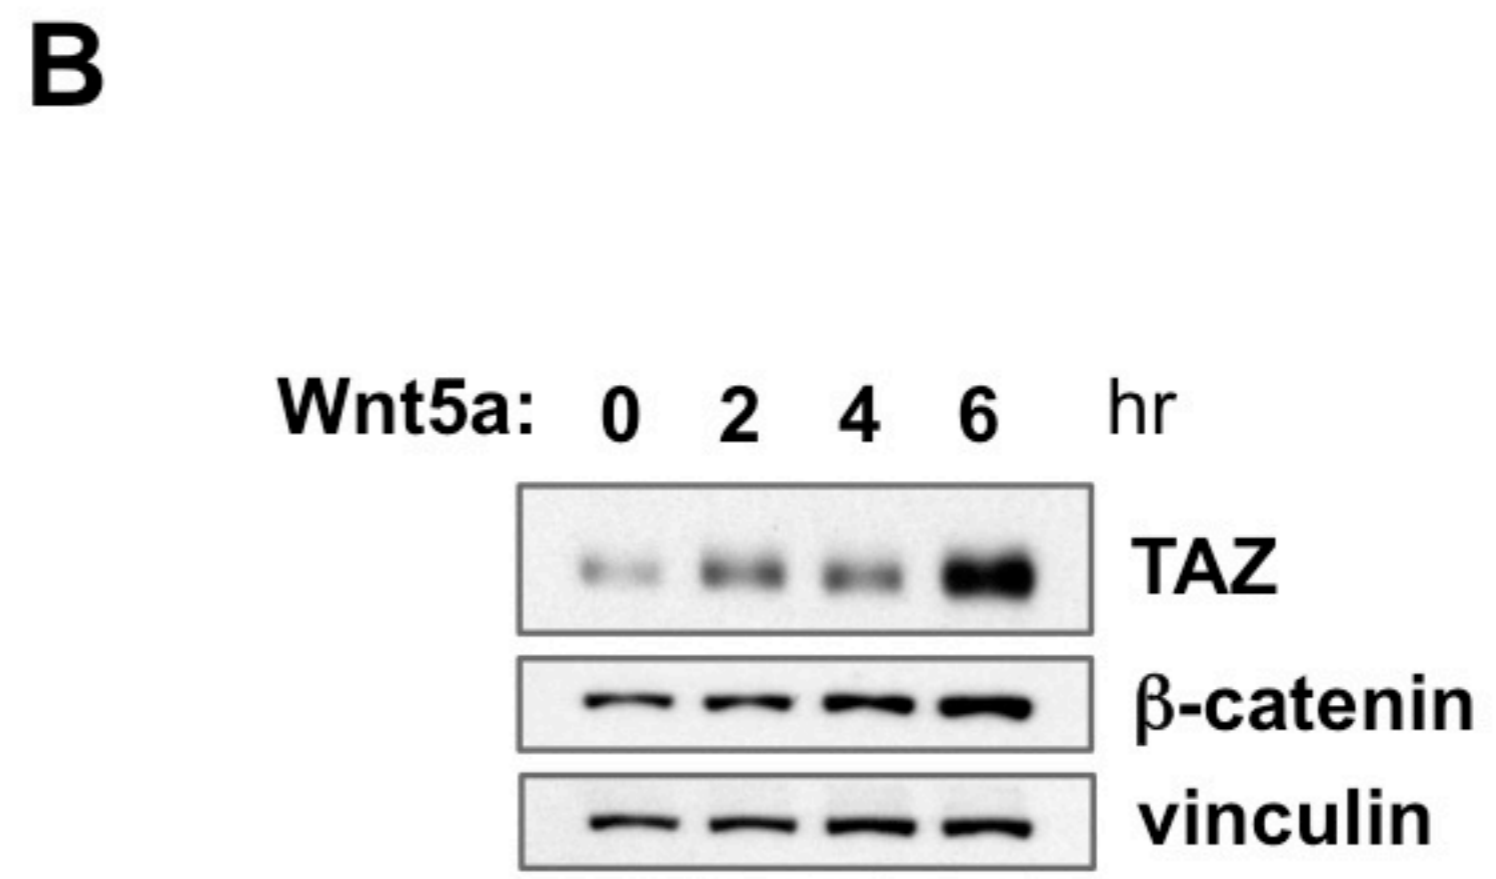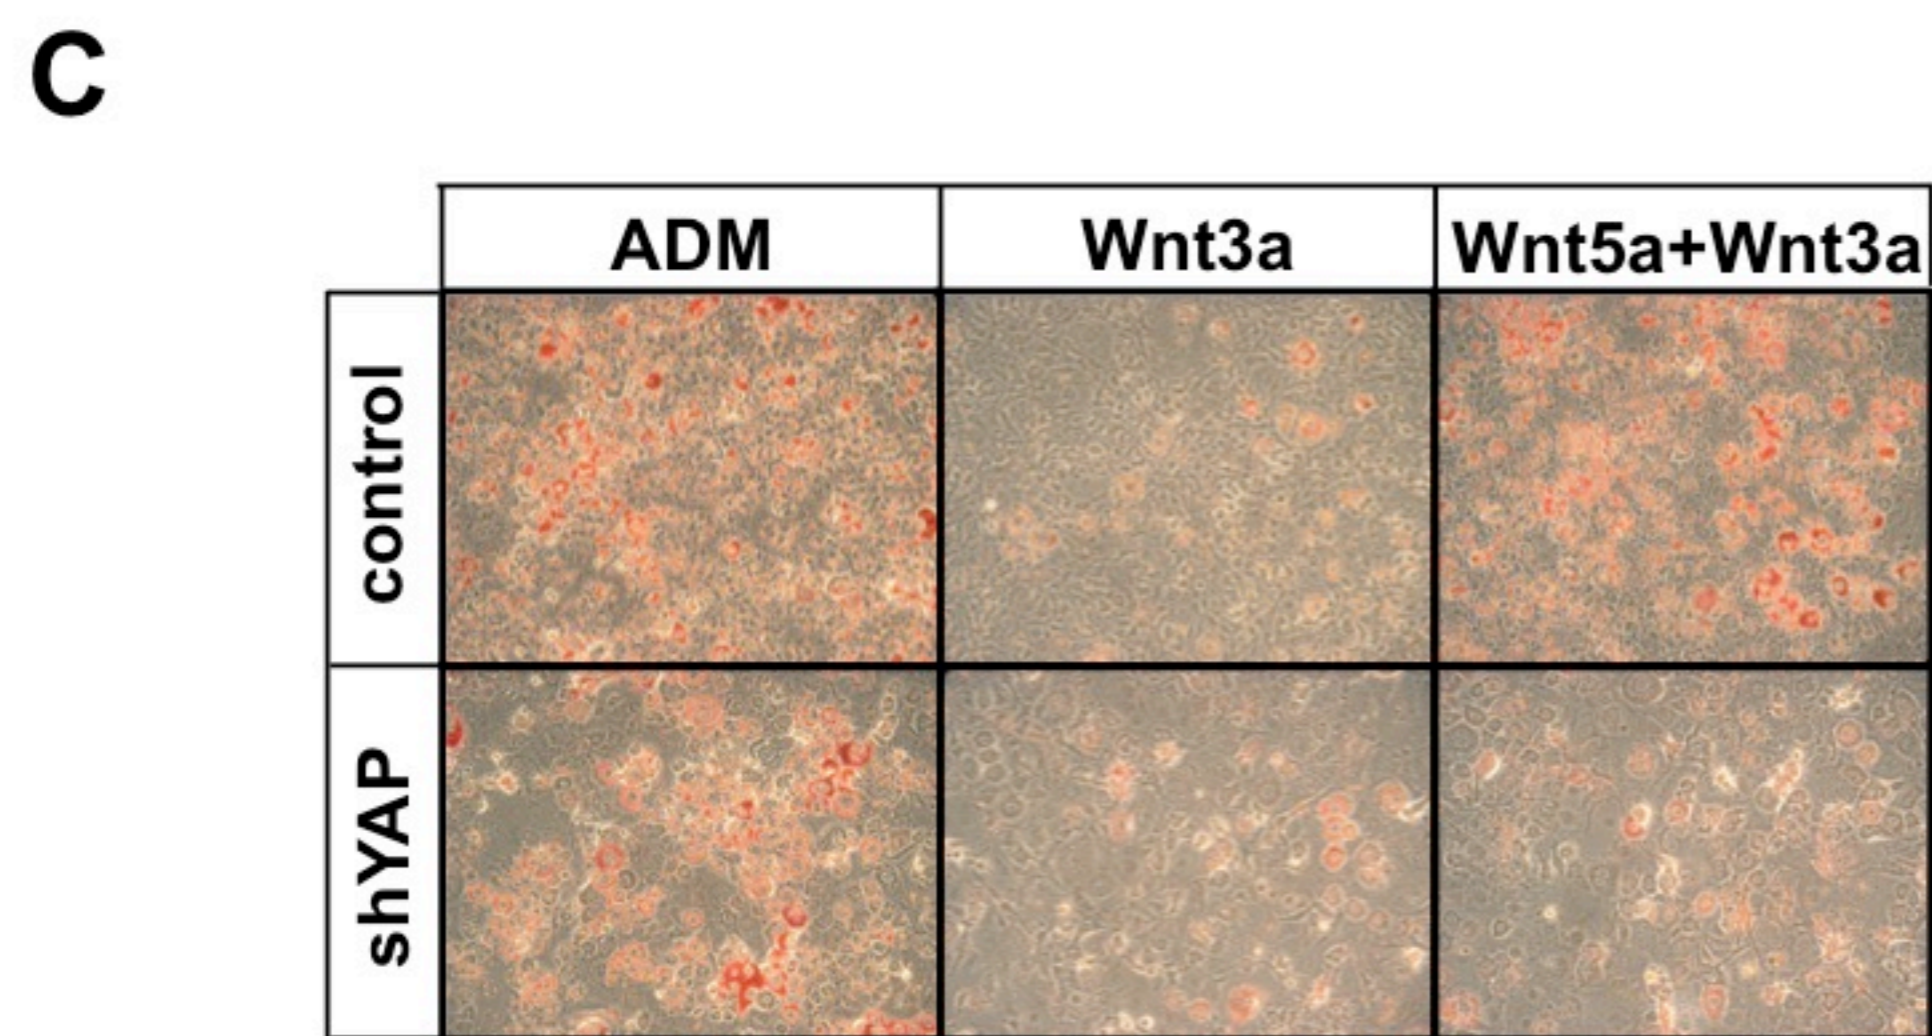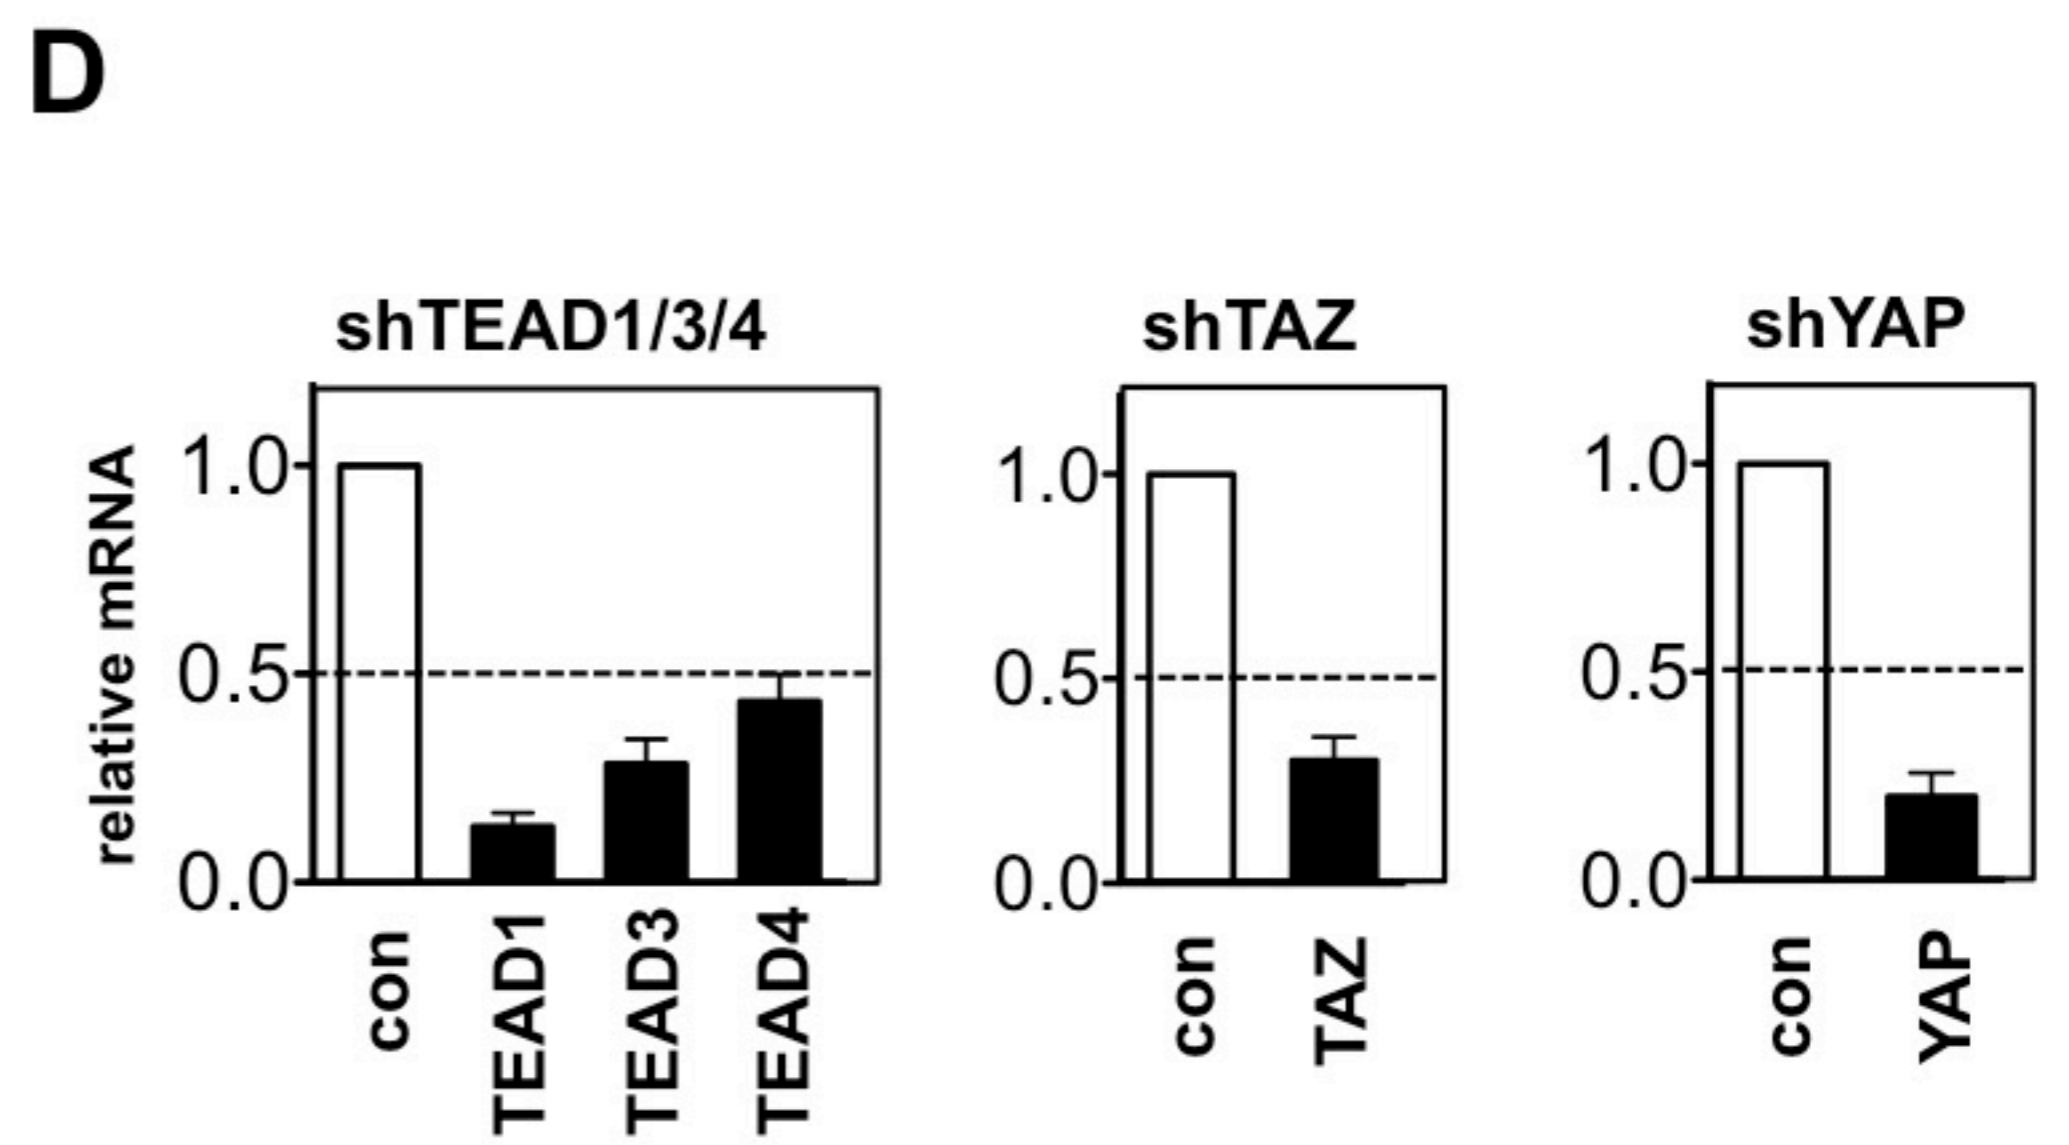

Supplement: NIHMS708990-supplement-7.pdf [file NIHMS708990-supplement-7.pdf]
